# Supplementary material for: Detailed computational analysis revealed mutation V210I on PrP induced conformational conversion on β2–α2 loop and α2–α3
Source: Royal Society of Chemistry journal article supplement (doi:10.1039/c6mb00342g), 2016-08-01
Supplement: c6mb00342g1.pdf [file c6mb00342g1.pdf]

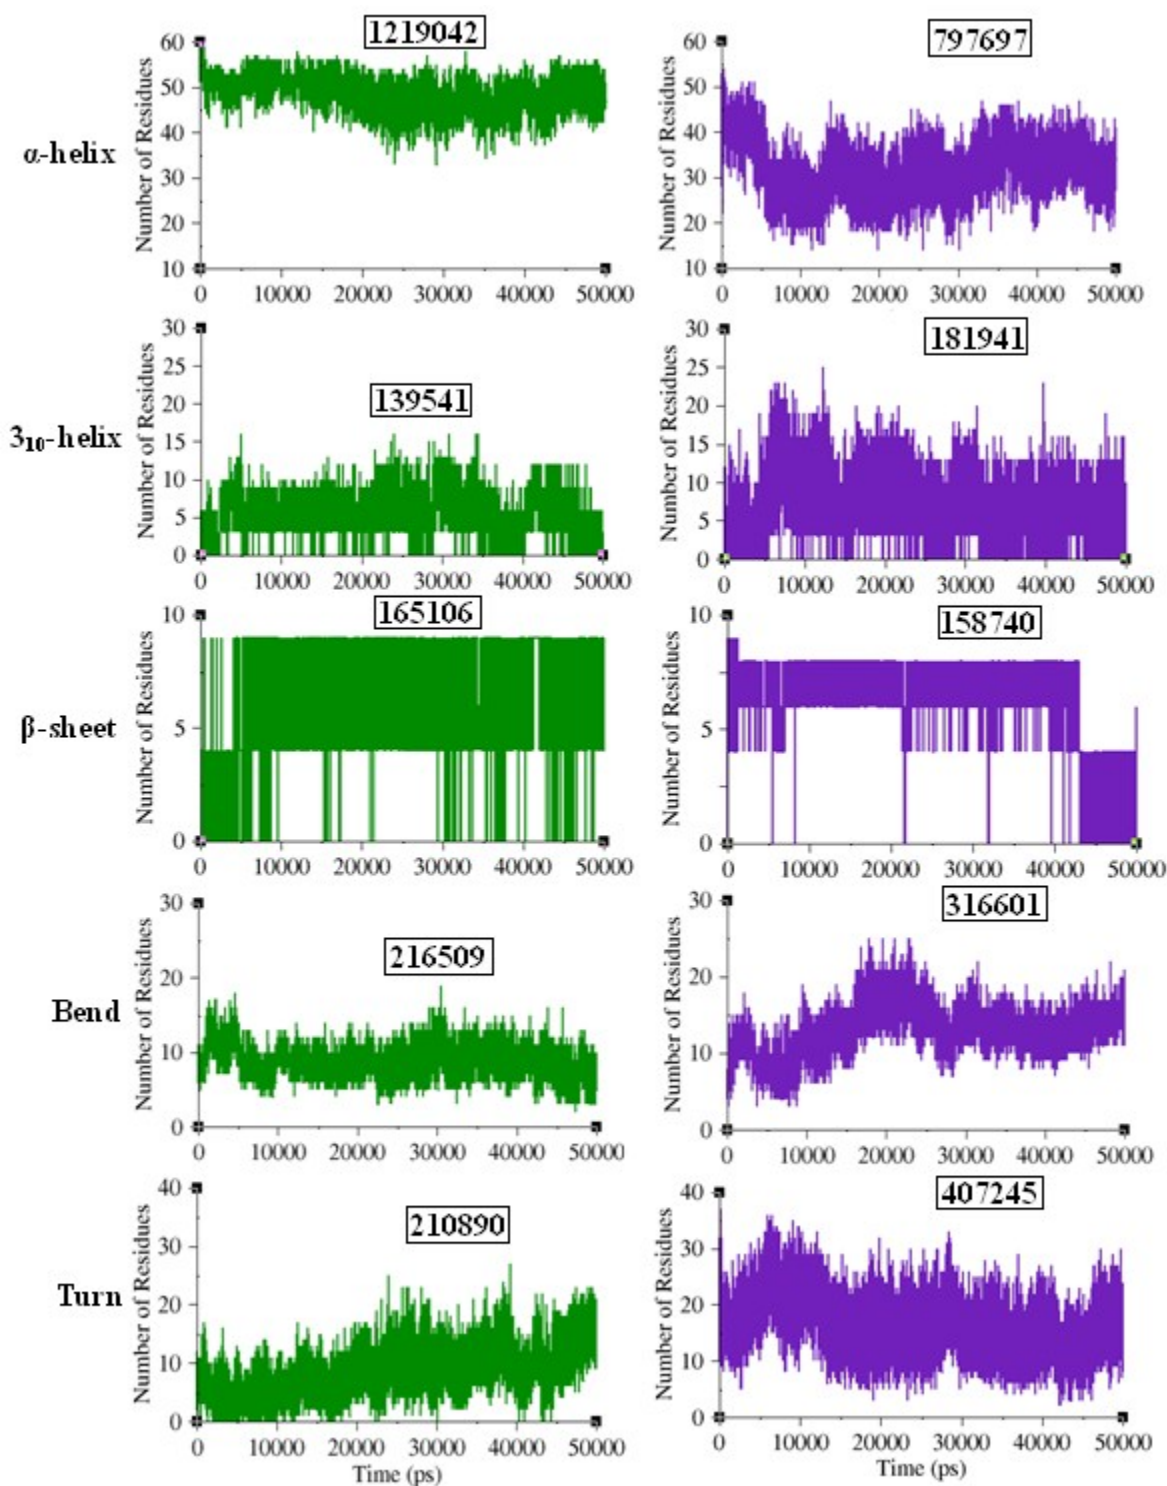

**Supplementary Fig. 1** Number of residues involved in each secondary structural element in the WT-PrP (green) and its mutant (indigo) as a function of time. Total number of residues was mentioned in box.

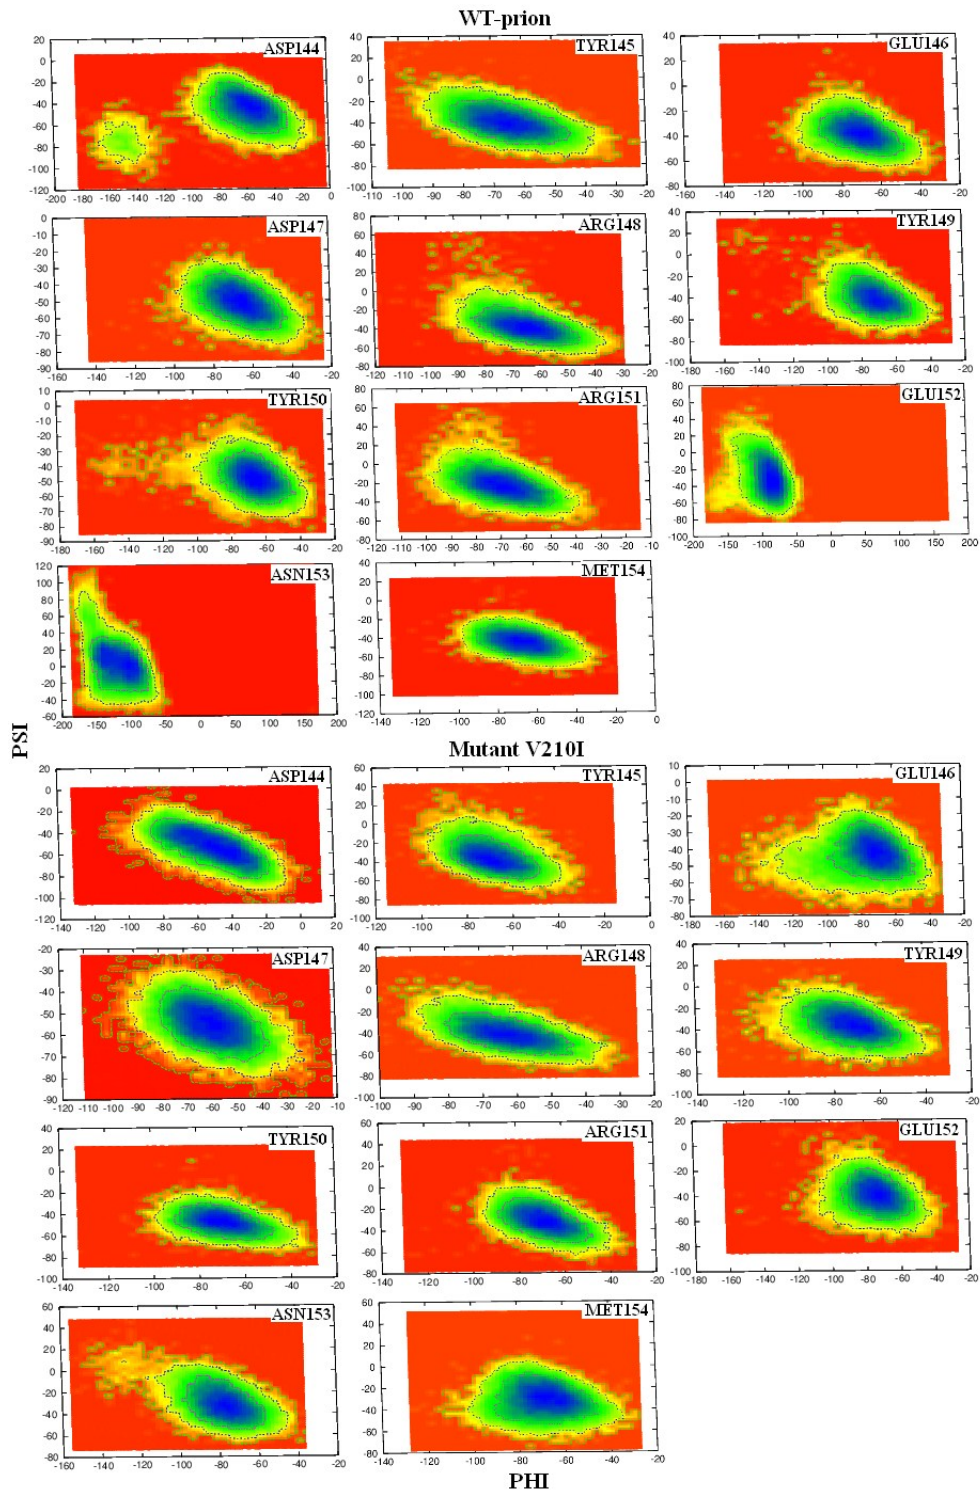

**Supplementary Fig. 2** Phi and Psi angles of  $\alpha 1$  residues present in the WT-PrP and its mutant.



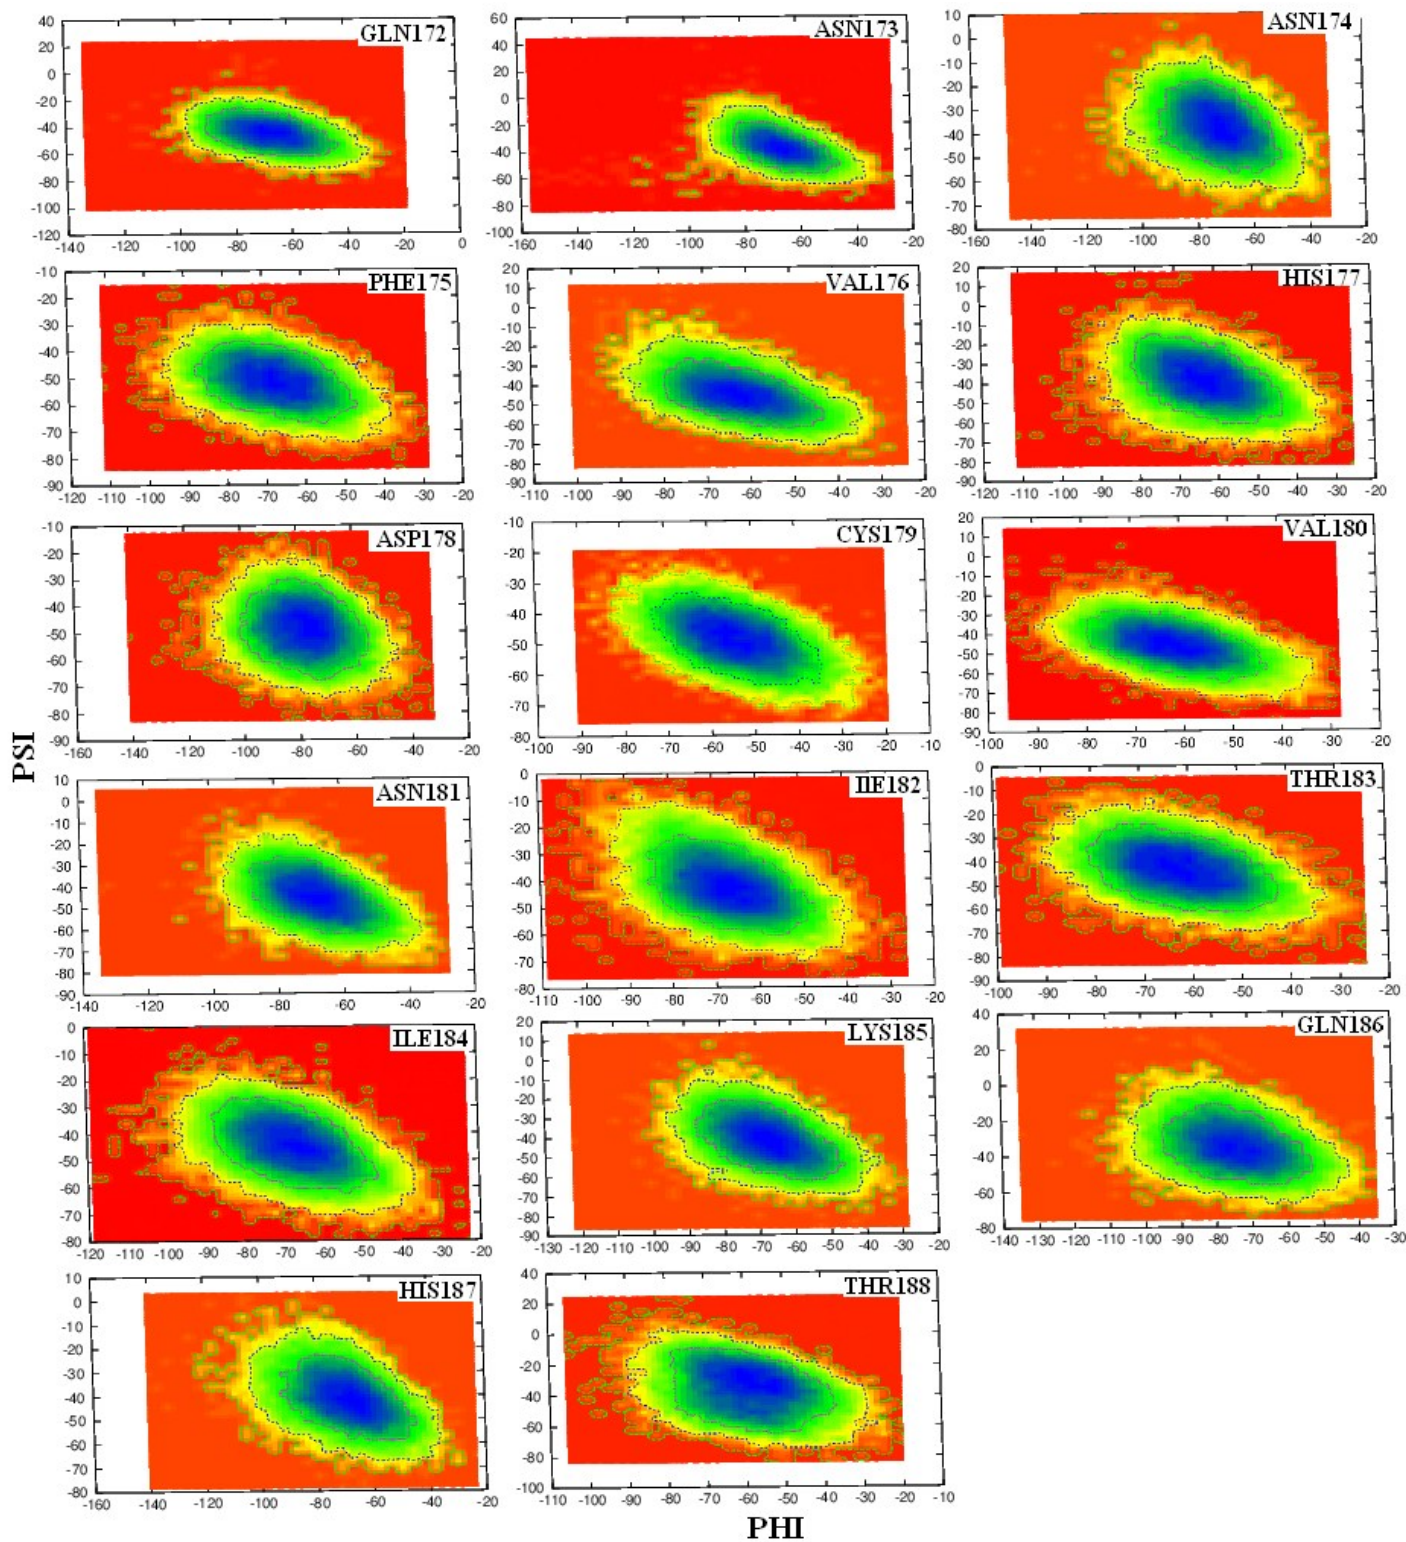

**Supplementary Fig. 3** Phi and Psi angles of  $\alpha 2$  residues present in the WT-PrP.

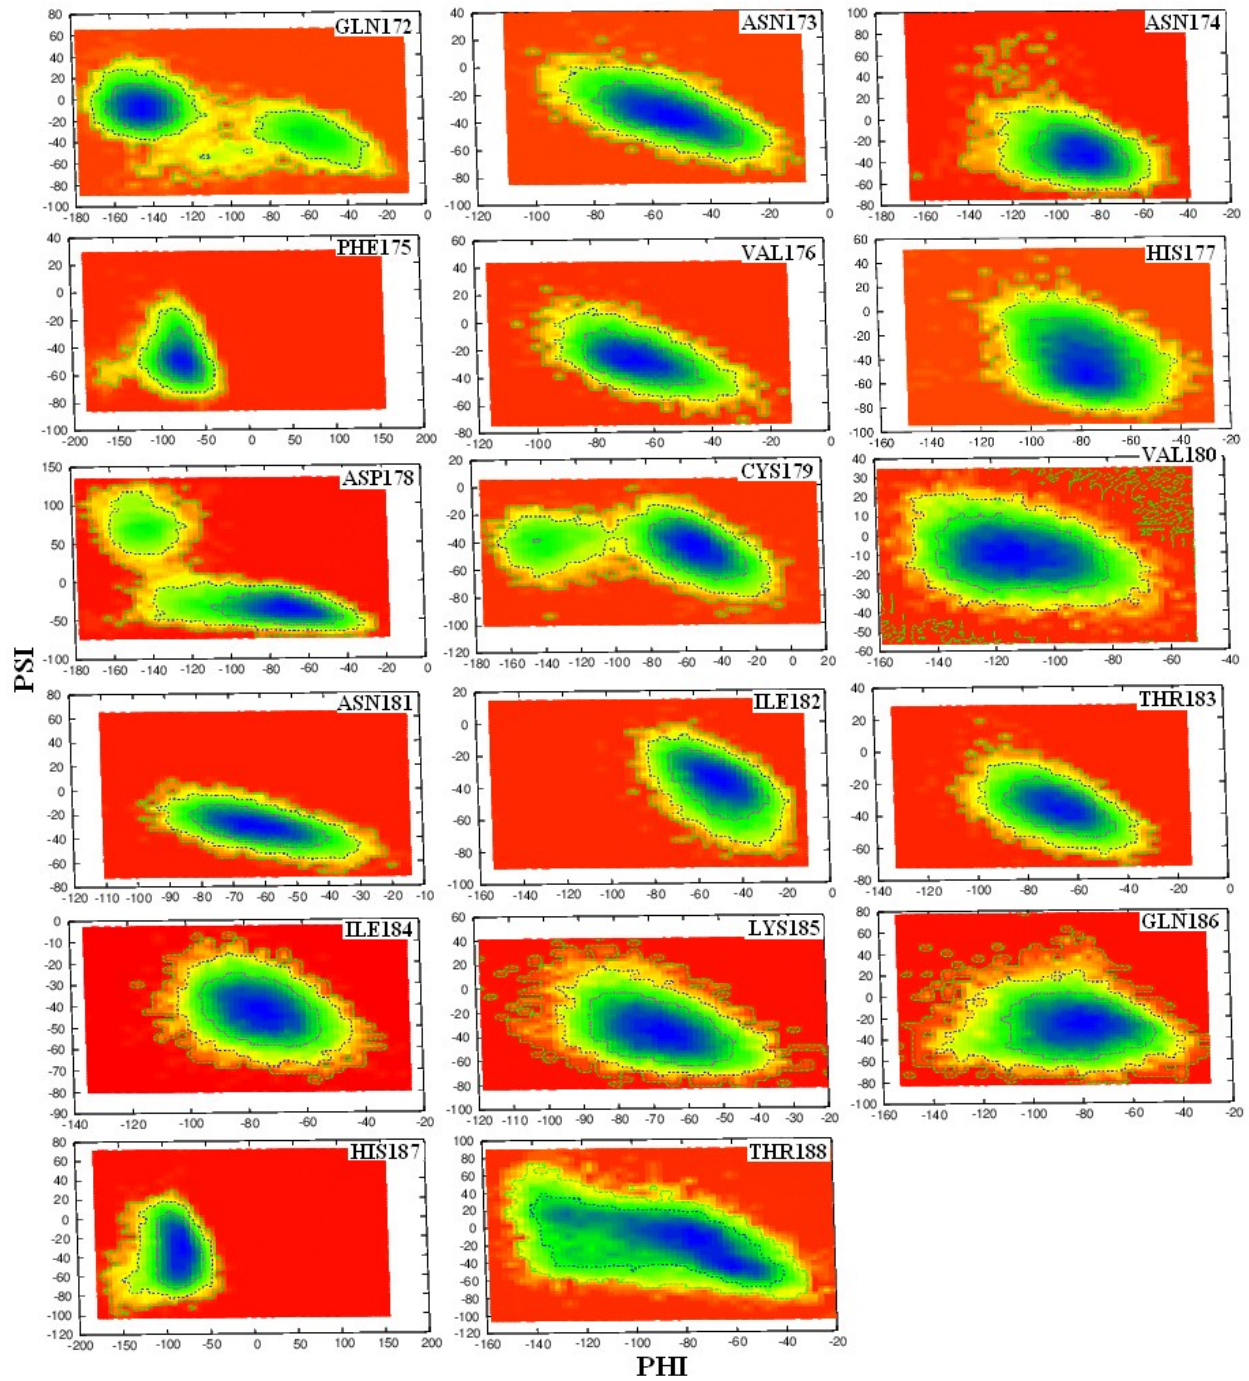

**Supplementary Fig. 4** Phi and Psi angles of  $\alpha 2$  residues present in the mutant V210I.



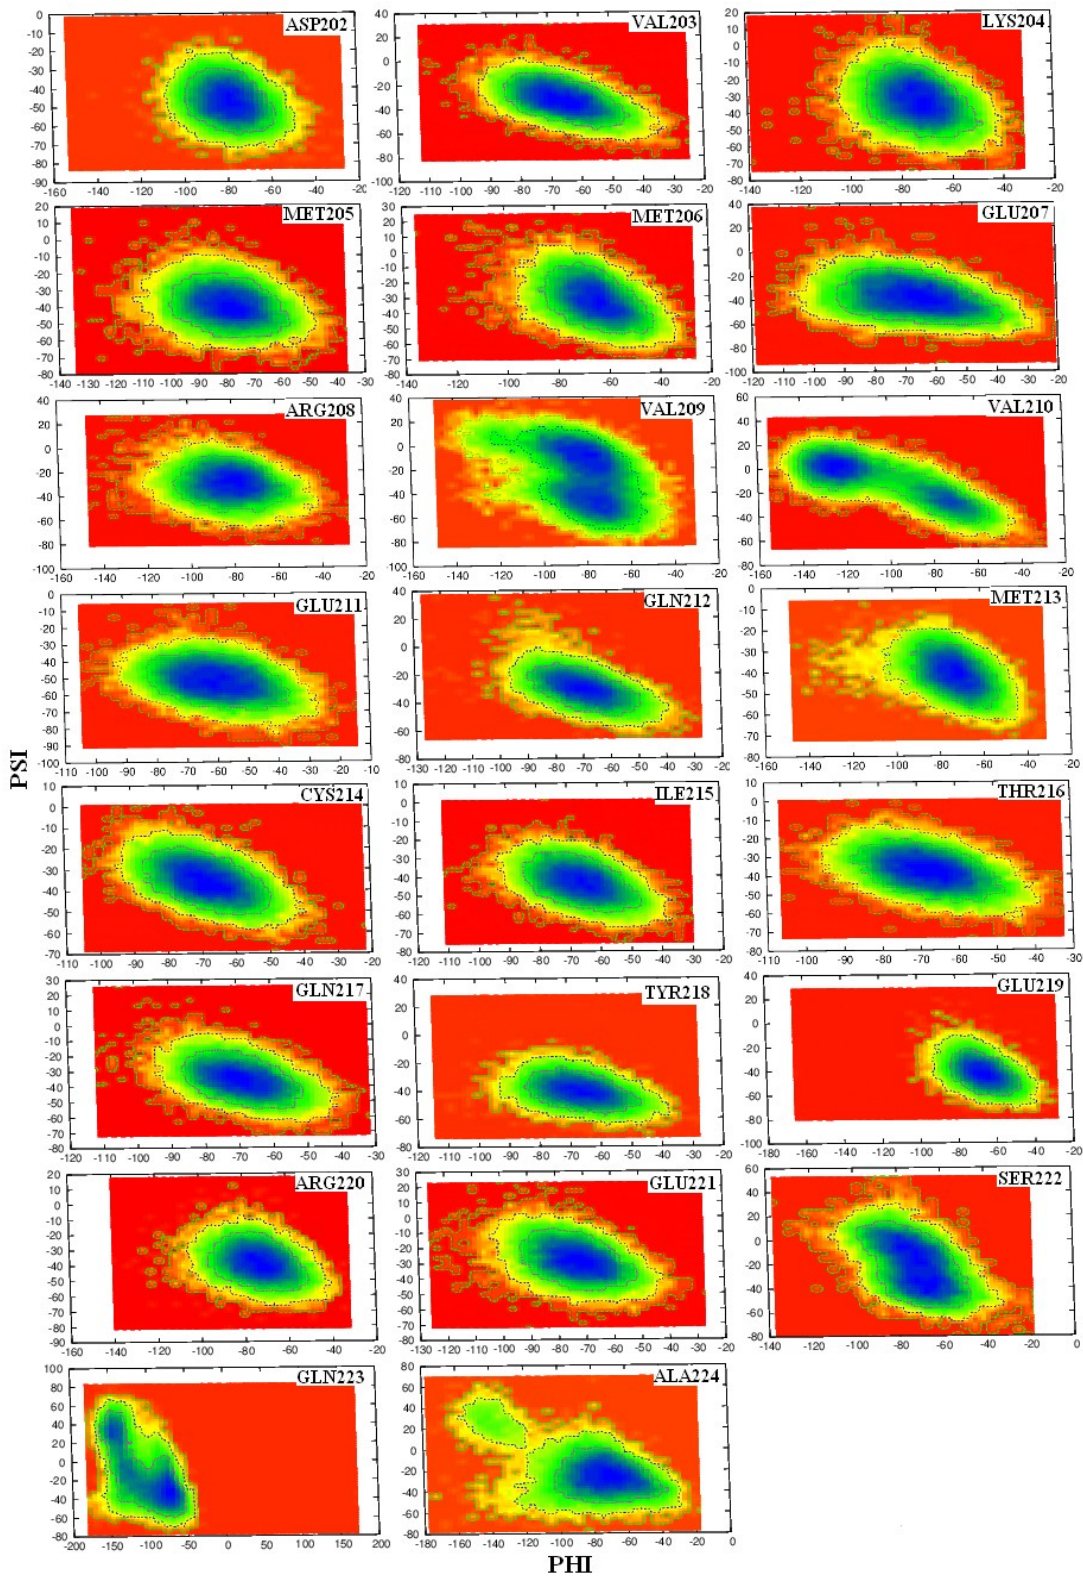

Supplementary Fig. 5 Phi and Psi angles of  $\alpha 3$  residues present in the WT-PrP.

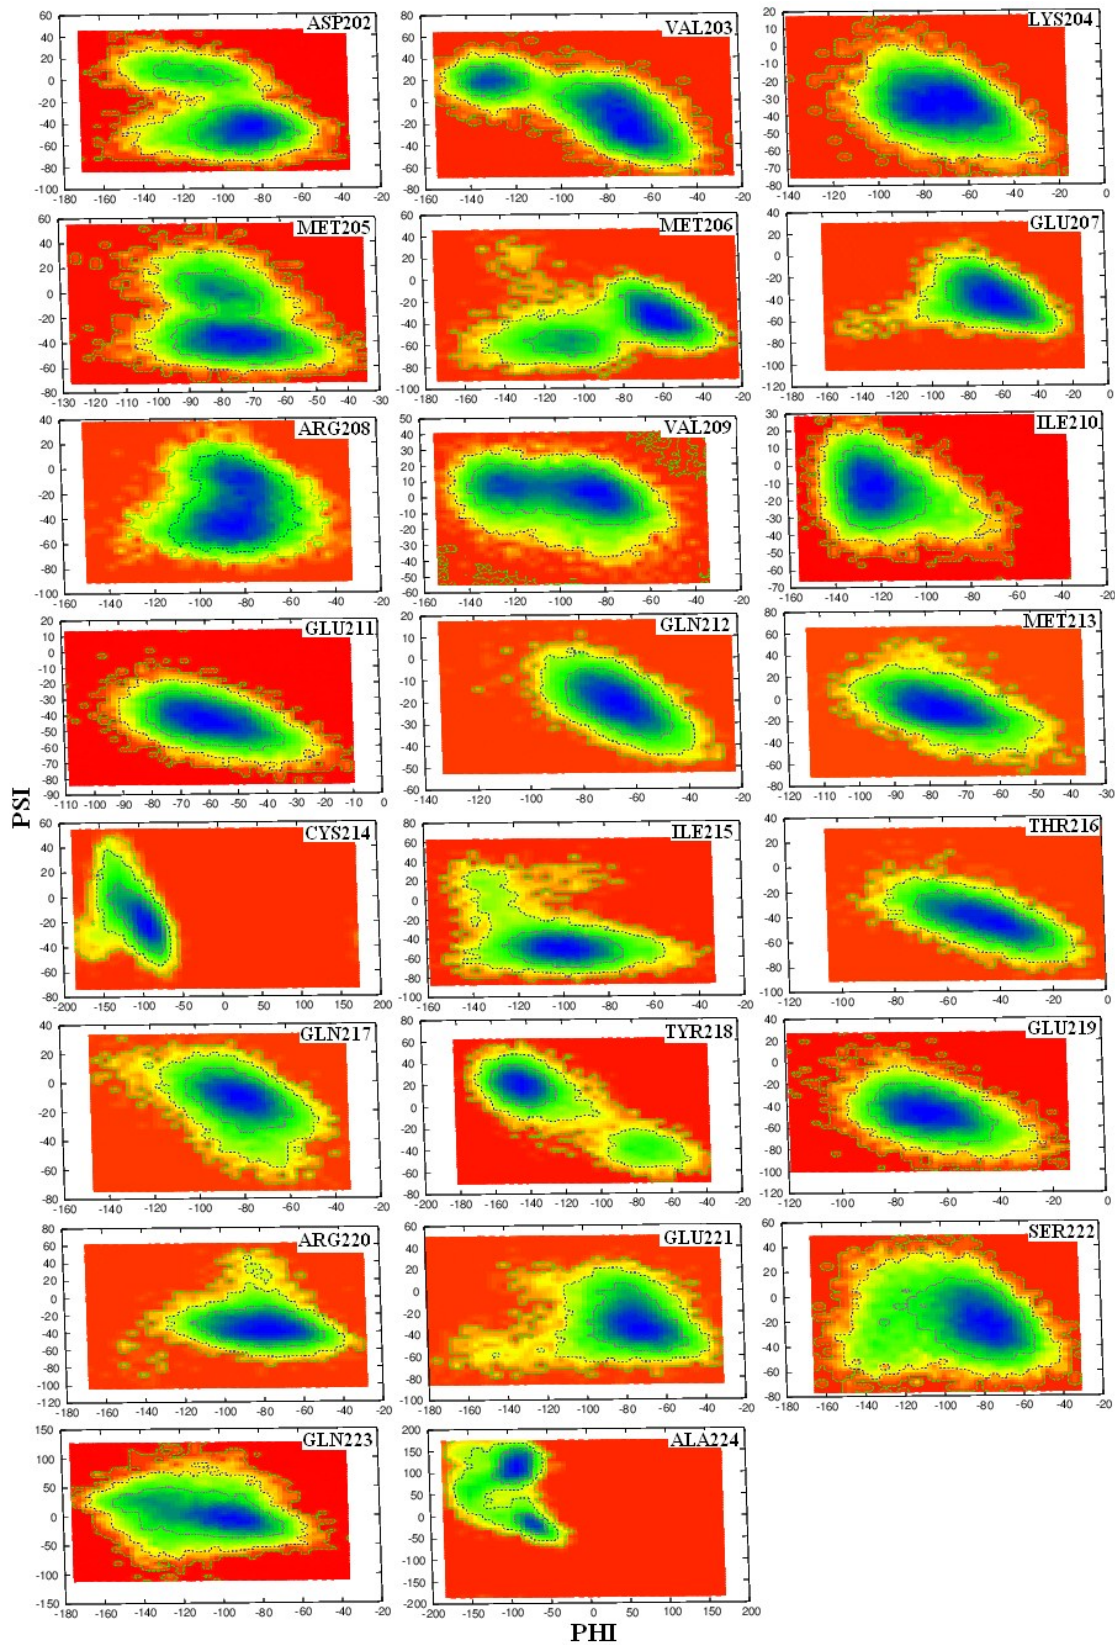

Supplementary Fig. 6 Phi and Psi angles of  $\alpha 3$  residues present in the mutant V210I.
