# Supplementary material for: Detailed computational analysis revealed mutation V210I on PrP induced conformational conversion on β2–α2 loop and α2–α3
Source: Royal Society of Chemistry journal article supplement (doi:10.1039/c6mb00342g), 2016-08-01
Supplement: c6mb00342g2.pdf [file c6mb00342g2.pdf]

**Supplementary Table 1** Solvent accessible surface area of residues present in the  $\alpha 1$ - $\alpha 3$  of WT-PrP and its mutant

| Residues | ASA( $\text{\AA}^2$ ) |        |          |            |        |          |            |        |
|----------|-----------------------|--------|----------|------------|--------|----------|------------|--------|
|          | WT-PrP                | V210I  | Residues | WT-PrP     | V210I  | Residues | WT-PrP     | V210I  |
|          | $\alpha 1$            |        |          | $\alpha 2$ |        |          | $\alpha 3$ |        |
| Gly142   | 12.411                | 23.146 | Gln172   | 24.710     | 7.033  | Glu200   | 39.543     | 32.206 |
| Ser143   | 19.716                | 21.082 | Asn173   | 29.170     | 32.623 | Thr201   | 29.165     | 31.715 |
| Asp144   | 24.937                | 26.593 | Asn174   | 26.035     | 36.141 | Asp202   | 10.5169    | 10.734 |
| Tyr145   | 44.488                | 39.379 | Phe175   | 0.174      | 15.670 | Val203   | 13.914     | 1.958  |
| Glu146   | 19.355                | 21.236 | Val176   | 1.223      | 2.795  | Lys204   | 43.215     | 31.333 |
| Asp147   | 9.787                 | 9.585  | His177   | 44.528     | 19.146 | Met205   | 5.229      | 7.562  |
| Arg148   | 36.881                | 34.964 | Asp178   | 4.381      | 20.675 | Met206   | 0.349      | 0.524  |
| Tyr149   | 33.003                | 44.483 | Cys179   | 0.155      | 0      | Glu207   | 19.267     | 15.537 |
| Tyr150   | 0.979                 | 14.111 | Val180   | 2.271      | 0.524  | Arg208   | 31.692     | 41.698 |
| Arg151   | 41.763                | 32.107 | Asn181   | 20.901     | 15.653 | Val209   | 2.174      | 2.276  |
| Glu152   | 41.543                | 35.319 | Ile182   | 1.048      | 12.118 | Ile210   | 0          | 1.922  |
| Asn153   | 8.684                 | 14.326 | Thr183   | 0.105      | 1.57   | Glu211   | 13.537     | 18.647 |
| Met154   | 21.249                | 10.387 | Ile184   | 6.815      | 6.290  | Gln212   | 34.541     | 11.380 |
|          |                       |        | Lys185   | 36.873     | 44.838 | Met213   | 2.970      | 6.290  |
|          |                       |        | Gln186   | 14.223     | 21.132 | Cys214   | 0          | 0      |
|          |                       |        | His187   | 4.708      | 7.593  | Ile215   | 19.888     | 8.212  |
|          |                       |        | Thr188   | 9.518      | 18.803 | Thr216   | 13.159     | 21.730 |

|        |        |        |
|--------|--------|--------|
| Gln217 | 1.870  | 30.70  |
| Tyr218 | 9.949  | 23.967 |
| Glu219 | 32.998 | 18.583 |
| Arg220 | 35.282 | 55.149 |
| Glu221 | 2.008  | 15.943 |
| Ser222 | 7.742  | 0.634  |

---

**ASA**-Accessible surface area
